# Supplementary material for: A Guide to Human Zinc Absorption: General Overview and Recent Advances of In Vitro Intestinal Models
Source: Nutrients. 2020 Mar 13;12(3):762. doi: 10.3390/nu12030762 (PMC7146416; doi:10.3390/nu12030762)
Supplement: Supplementary file 1 [file nutrients-12-00762-s001.pdf]

## Supplemental Material

### A guide to human zinc absorption: general overview and recent advances of *in vitro* intestinal models

**Maria Maares<sup>1</sup>, Hajo Haase<sup>1,2,\*</sup>**

<sup>1</sup> Technische Universität Berlin, Chair of Food Chemistry and Toxicology, Germany

<sup>2</sup> TraceAge - DFG Research Unit on Interactions of essential trace elements in healthy and diseased elderly, Potsdam-Berlin-Jena, Germany

\*Corresponding author:

Technische Universität Berlin, Chair of Food Chemistry and Toxicology, Straße des 17. Juni 135, 10623 Berlin, Germany Tel: +49 (0) 30 31472701

Fax: +49 (0) 30 31472823

E-Mail: Haase@TU-Berlin.de

**Table 1.** Zinc content of the human body.

| Tissue         | Weight (g) * | Ref. | Zinc Concentration (µg/g tissue wet weight) | Ref. | Total Zinc Content (g) | Proportion of Total Body Zinc * (%) |
|----------------|--------------|------|---------------------------------------------|------|------------------------|-------------------------------------|
| Eye            | 7.5          | [1]  | 1.3                                         | [2]  | <0.01                  | <0.01                               |
| Liver          | 1,500        | [3]  | 58                                          | [4]  | 0.09                   | 3.4                                 |
| Heart          | 331          | [5]  | 26.5                                        | [6]  | 0.01                   | 0.3                                 |
| Brain          | 1,407        | [3]  | 11                                          | [6]  | 0.02                   | 0.6                                 |
| Lung           | 840          | [3]  | 16                                          | [6]  | 0.01                   | 0.5                                 |
| Kidneys        | 266          | [3]  | 55                                          | [4]  | 0.01                   | 0.6                                 |
| Intestine      | 2,100        | [7]  | 15.5                                        | [6]  | 0.03                   | 1.3                                 |
| Stomach        | 130          | [8]  | 13.4                                        | [6]  | <0.01                  | 0.1                                 |
| Bone           | 9,458        | [9]  | 100                                         | [4]  | 0.95                   | 36.7                                |
| Muscle         | 25,100       | [10] | 51                                          | [4]  | 1.28                   | 49.7                                |
| Blood plasma   | 3,437        | [11] | 1.25 [µg/mL]                                | [12] | <0.01                  | 0.2                                 |
| Whole Blood    | 5,509        | [11] | 6.81 [µg/mL]                                | [6]  | 0.04                   | 1.5                                 |
| Hair and nails | 53.8         | [9]  | 247                                         | [13] | 0.01                   | 0.5                                 |
| Skin           | 3,405.54     | [9]  | 32                                          | [4]  | 0.11                   | 4.2                                 |
| Spleen         | 139          | [3]  | 14.7                                        | [6]  | <0.01                  | 0.1                                 |
| Pancreas       | 119          | [14] | 33.3                                        | [15] | <0.01                  | 0.2                                 |
|                |              |      |                                             |      | <b>Σ 2.6</b>           | <b>100</b>                          |

\* calculated for a 60–70 kg adult, based on the respective body weight used as references for tissue weight.

**Table 2.** Recommended daily allowance for dietary zinc intake for selected life-stages.

| WHO [16]           |                                     |                  |                  | EFSA [17] |                |      |          | DGE [18]                            |                  |                   |                  |                  |                   |    |    |
|--------------------|-------------------------------------|------------------|------------------|-----------|----------------|------|----------|-------------------------------------|------------------|-------------------|------------------|------------------|-------------------|----|----|
| Age, Sex           | RNI (mg/d)                          |                  |                  | Age       | PRI (mg/d)     |      | Age      | RDI (mg/d)                          |                  |                   |                  |                  |                   |    |    |
|                    | High <sup>a</sup>                   | Mod <sup>b</sup> | Low <sup>c</sup> |           |                |      |          |                                     |                  |                   |                  |                  |                   |    |    |
| 7–12 mos           | 0.8 <sup>d</sup> ; 2.5 <sup>e</sup> | 4.1              | 8.4              | 7–11 mos  | 2.9            |      | <4 mos   | 1.5                                 |                  |                   |                  |                  |                   |    |    |
| 1–3 yr             | 2.4                                 | 4.1              | 8.3              | 1–3 yr    | 4.3            |      | 4–12 mos | 2.5                                 |                  |                   |                  |                  |                   |    |    |
| 4–6 yr             | 2.9                                 | 4.8              | 9.6              | 4–6       | 5.5            |      | 1–4 yr   | 3.0                                 |                  |                   |                  |                  |                   |    |    |
| 7–9 yr             | 3.3                                 | 5.6              | 11.2             | 7–10      | 7.4            |      | 4–7 yr   | 4.0                                 |                  |                   |                  |                  |                   |    |    |
| 10–18 yr, m        | 5.1                                 | 8.6              | 17.1             |           | m              | f    | 7–10 yr  | 6.0                                 |                  |                   |                  |                  |                   |    |    |
| 10–18 yr, f        | 4.3                                 | 7.2              | 14.4             | 11–14 yr  | 9.4            | 9.4  |          | m                                   |                  |                   | f                |                  |                   |    |    |
| 19–65 yr, m        | 4.2                                 | 7.0              | 14.0             | 15–17 yr  | 12.5           | 10.4 | Phytate  | Low <sup>f</sup>                    | Med <sup>g</sup> | High <sup>h</sup> | Low <sup>f</sup> | Med <sup>g</sup> | High <sup>h</sup> |    |    |
| 19–65 yr, f        | 3.0                                 | 4.9              | 9.8              | Age       | Phytate (mg/d) |      | 10–13 yr | 9                                   |                  |                   | 8                |                  |                   |    |    |
| > 65 yr, m         | 4.2                                 | 7.0              | 14.0             | ≥ 18 yr   | 300            | 9.4  | 7.5      | 13–15 yr                            | 12               |                   |                  | 10               |                   |    |    |
| > 65 yr, f         | 3.0                                 | 4.9              | 9.8              | ≥ 18 yr   | 600            | 11.7 | 9.3      | 15–19 yr                            | 14               |                   |                  | 11               |                   |    |    |
| Pregnancy          |                                     |                  |                  | ≥ 18 yr   | 900            | 14.0 | 11.0     | ≥19 yr                              | 11               | 14                | 16               | 7                | 8                 | 10 |    |
| 1 <sup>st</sup> TT | 3.4                                 | 5.5              | 11.0             | ≥ 18 yr   | 1200           | 16.3 | 12.7     | Pregnancy                           |                  |                   |                  |                  |                   |    |    |
| 2 <sup>nd</sup> TT | 4.2                                 | 7.0              | 14.0             |           |                |      |          | 1 <sup>st</sup> TT                  |                  |                   |                  | 7                | 9                 | 11 |    |
| 3 <sup>rd</sup> TT | 6.0                                 | 10.0             | 20.0             | Pregnancy |                | +1.6 |          | 2 <sup>nd</sup> –3 <sup>rd</sup> TT |                  |                   |                  |                  | 9                 | 11 | 13 |
| Lactation          |                                     |                  |                  | Lactation |                | +2.9 |          | Lactation                           |                  |                   |                  |                  | 11                | 13 | 14 |
| 0–3 mo             | 5.8                                 | 9.5              | 19.0             |           |                |      |          |                                     |                  |                   |                  |                  |                   |    |    |
| 3–6 mo             | 5.3                                 | 8.8              | 17.5             |           |                |      |          |                                     |                  |                   |                  |                  |                   |    |    |
| 6–12 mo            | 4.3                                 | 7.2              | 14.4             |           |                |      |          |                                     |                  |                   |                  |                  |                   |    |    |

BV, bioavailability; EFSA, European Food Safety Authority; DGE, German Society for Nutrition (*ger.: Deutsche Gesellschaft für Ernährung*); f, female; m, male; mos, months; PRI, population reference intake; RDI, recommended daily intake; RNI, recommended nutrient intake; TT, trimester; WHO, World Health Organization; yr, years; <sup>a</sup>High bioavailability (50%); <sup>b</sup>Moderate bioavailability (30%); <sup>c</sup>Low bioavailability (15%); <sup>d</sup>exclusively breastfed infants (bioavailability 80%); <sup>e</sup>not exclusively breastfed; <sup>f</sup>300 mg phytate/d; <sup>g</sup>660 mg phytate/d; <sup>h</sup>990 mg phytate/d; Recommendations for adults from EFSA and DGE include different phytate levels using a trivariate model by Miller *et al.* [19] for assessing the relationship between dietary phytate, dietary zinc, and absorbed zinc.

**Table 3.** Application of human *in vitro* intestinal models to study zinc-dependent gene expression in enterocytes.

| Cell Model                                               | Incubation Parameter                                                                                                                                                                   | Analysis                                                                          | Main Outcome                                                                                                                                                                                                                                                                                                                    | Reference |
|----------------------------------------------------------|----------------------------------------------------------------------------------------------------------------------------------------------------------------------------------------|-----------------------------------------------------------------------------------|---------------------------------------------------------------------------------------------------------------------------------------------------------------------------------------------------------------------------------------------------------------------------------------------------------------------------------|-----------|
| Caco-2<br>Differentiation time:<br>14 d<br>2D            | Recombinant expression<br>of myc-tagged hZnT-5B<br>in Caco-2 cells<br>Addition of ZnCl <sub>2</sub> to<br>growth medium:<br>Stepwise increase from<br>20, 50 and 100 µM each<br>for 7d | Recombinant transfection<br>Gene expression:<br>RT-PCR<br>Immunochemical staining | - highest expression of ZTL1 in mouse<br>kidney, brain, duodenum and jejunum<br>- apical localization of hZTL1 at apical<br>membrane of Caco-2<br>- hZTL1 (later named ZnT-5B) and MT<br>expression increased in Caco-2-WT cells after<br>prolonged zinc treatment                                                              | [20]      |
| Caco-2<br>Cultivation time:<br>14 d<br>2D                | Human study: 25 mg<br>ZnSO <sub>4</sub> /d<br>(placebo Na SO <sub>4</sub> );<br>duration: 14 d<br>Caco-2: 100 µM or 200<br>µM ZnCl <sub>2</sub><br>(in DMEM + 10% FCS)<br>for 3 d      | Gene expression:<br>RT-PCR<br>Protein quantification:<br>Immunocytochemistry      | - mRNA and protein expression of ZnT-1,<br>ZnT-5, ZIP4 in enterocytes (biopsies of<br>ileal mucosa) ↓<br>- <i>znt-1</i> ↓<br>- MT mRNA increased ↑<br>- mRNA and protein expression in Caco-2<br>cells was in agreement with human study<br>- localization of ZnT-5 at apical membrane<br>of human enterocytes and Caco-2 cells | [21]      |
| Caco-2<br>Cultivation time:<br>24 h<br>2D                | 0-100 µM ZnCl <sub>2</sub> (in<br>serum-free DMEM)                                                                                                                                     | Transient transfection of<br>Caco-2 cells with pEGFP-<br>ZnT5B                    | - ZnT-5 variant b is a bidirectional zinc<br>transporter and can operate in an efflux mode,<br>increasing cytoplasmic zinc concentration of<br>Caco-2 cells<br>- upregulation of MT-2 indicates increase<br>of intracellular zinc content in transfected Caco-2<br>cells                                                        | [22]      |
| Caco-2<br>Cultivation time:<br>24 h, pre-confluent<br>2D | 0-300 µM ZnSO <sub>4</sub><br>or 0-10 µM TPEN<br>(in n.a.)<br>for 6 or 12 h                                                                                                            | Gene expression:<br><i>q</i> PCR                                                  | - zinc-dependent mRNA expression of <i>mt-1</i> ,<br><i>dmt-1</i> , <i>zip4</i> and <i>znt-1</i> regulates zinc homeostasis<br>in Caco-2 cells<br>- <i>zip4</i> ↑ after zinc depletion with TPEN<br>- <i>mt-1</i> ↑ and <i>znt-1</i> with added zinc<br>concentration                                                           | [23]      |

|                                                                                                                                        |                                                                                                                        |                                                                                                                                                   |                                                                                                                                                                                                                                                                                                                                                                                                                                                                                                                                                                                                                                                                |      |
|----------------------------------------------------------------------------------------------------------------------------------------|------------------------------------------------------------------------------------------------------------------------|---------------------------------------------------------------------------------------------------------------------------------------------------|----------------------------------------------------------------------------------------------------------------------------------------------------------------------------------------------------------------------------------------------------------------------------------------------------------------------------------------------------------------------------------------------------------------------------------------------------------------------------------------------------------------------------------------------------------------------------------------------------------------------------------------------------------------|------|
| Caco-2 Differentiation time:<br>11-13 d<br>2D                                                                                          | Iron/zinc interaction<br>0-200 $\mu\text{M}$ $\text{ZnCl}_2$ or $\text{FeCl}_3$ ,<br>respectively, (in DMEM)<br>for 2h | Zinc uptake: radioactive<br>zinc ( $^{65}\text{Zn}$ )                                                                                             | <ul style="list-style-type: none"> <li>- iron uptake was inhibited dose-dependently by zinc</li> <li>- iron increased cellular zinc uptake</li> <li>- analysis suggests that iron and zinc transport by DMT-1 is not occurring simultaneously</li> </ul>                                                                                                                                                                                                                                                                                                                                                                                                       | [24] |
| Caco-2<br>Cultivation time:<br>14 d<br>2D                                                                                              | 3-100 $\mu\text{M}$ $\text{ZnCl}_2$ (in<br>DMEM+ 10%FCS)<br>for 12 or 24 h                                             | Transcriptomic study:<br>Micro-array<br>Gene expression:<br><i>q</i> PCR                                                                          | <ul style="list-style-type: none"> <li>- zinc-regulated genes were analyzed with an micro-array</li> <li>- identification of several genes which are regulated zinc-dependent (such as <i>mt-1h</i>, <i>mt-2a</i>, <i>mt-3</i>, <i>mtf-1</i>)</li> </ul>                                                                                                                                                                                                                                                                                                                                                                                                       | [25] |
| Caco-2<br>Cultivation time:<br>21d<br>3D Transwell<br>(comparison<br>undifferentiated and<br>differentiated cells)                     | 100-800 $\mu\text{M}$ $\text{ZnCl}_2$ (in<br>DMEM + 5% FCS)<br>apical or basolateral<br>incubation)<br>for 24 h        | Gene expression:<br><i>q</i> PCR                                                                                                                  | <ul style="list-style-type: none"> <li>- influence of polarization and differentiation of Caco-2 cells on zinc tolerance</li> <li>- mRNA expression of <i>znt-1</i> <math>\uparrow</math>, <i>znt-5</i>, <i>zip1</i>, <i>zip4</i>, <i>mt-1a</i> <math>\uparrow</math>, <i>mt-1x</i> <math>\uparrow</math>, <i>mt-2a</i> <math>\uparrow</math> after exposure with higher zinc concentrations (100-800 <math>\mu\text{M}</math>; apical or basolateral, respectively)</li> <li>- under physiologic zinc concentrations (apical: 100 <math>\mu\text{M}</math>; basolateral: 15 <math>\mu\text{M}</math> zinc) only <i>mt-1a</i> <math>\uparrow</math></li> </ul> | [26] |
| Caco-2 (1)<br><br>FHs 74 Int cells (2)<br>Cultivation time (1):<br>Undifferentiated (U)<br>(4 d)<br>Differentiated (D)<br>(12 d)<br>2D | 50 $\mu\text{M}$ $\text{ZnSO}_4$ (in serum<br>free medium)<br>for 15 min                                               | Zinc uptake: radioactive<br>zinc ( $^{65}\text{Zn}$ )<br>Gene expression:<br><i>q</i> PCR<br>Western Blot<br>Biotinylation of surface<br>proteins | <ul style="list-style-type: none"> <li>- role of zinc exposure on intestinal cells of varying maturity;</li> <li>- zinc uptake in fetal intestinal cells and undifferentiated cells was higher than in differentiated cells</li> <li>- ZnT-1 protein and <i>znt-1</i>, <i>znt-2</i> as well as <i>mt-1</i> <math>\uparrow</math>, while <i>zip4</i> <math>\uparrow</math> in U and <math>\downarrow</math> in D Caco-2 cells</li> <li>- localization of ZIP4 and ZnT-1 at the plasma membrane of differentiated Caco-2 cells was significantly changed by zinc exposure</li> </ul>                                                                             | [27] |
| Caco-2<br>confluent cells<br>2D; 3D Transwell                                                                                          | 0-100 $\mu\text{M}$ $\text{ZnSO}_4$ (DMEM<br>+10% FCS)<br>for 7 d                                                      | Zinc Uptake: total Zn<br>Western blot                                                                                                             | <ul style="list-style-type: none"> <li>- cellular zinc content increased concentration-dependent (100 <math>\mu\text{M}</math>: 0.4 <math>\mu\text{g mg}^{-1}</math> protein)</li> </ul>                                                                                                                                                                                                                                                                                                                                                                                                                                                                       | [28] |

|                                                                                                                                  |                                                                                        |                                                                                                                                                                       |                                                                                                                                                                                                                                                                                                                                                                                                                                                                                    |      |
|----------------------------------------------------------------------------------------------------------------------------------|----------------------------------------------------------------------------------------|-----------------------------------------------------------------------------------------------------------------------------------------------------------------------|------------------------------------------------------------------------------------------------------------------------------------------------------------------------------------------------------------------------------------------------------------------------------------------------------------------------------------------------------------------------------------------------------------------------------------------------------------------------------------|------|
|                                                                                                                                  |                                                                                        |                                                                                                                                                                       | <ul style="list-style-type: none"> <li>- expression of TJ protein claudin-2 and tricellulin decreased with added zinc concentration</li> <li>- TEER increased with added zinc concentration</li> </ul>                                                                                                                                                                                                                                                                             |      |
| Caco-2<br>Cultivation time:<br>Undifferentiated: n.a.<br>Differentiated: 21d<br>2D; 3D Transwell<br>(EHS-coated matrix membrane) | 100 µM ZnCl <sub>2</sub> (DMEM +10% FCS)<br>for 48 h                                   | Transient transfection of Caco-2 cells with hZIP1<br>Gene expression: qPCR<br>Zinc uptake: radioactive zinc ( <sup>65</sup> Zn)<br>Immunocytochemistry                | <ul style="list-style-type: none"> <li>- role of hZIP1 in intestinal epithelial cells</li> <li>- hZIP1 tend to localize to the microvilli of Caco-2 cells during differentiation</li> <li>- Caco-2 cells overexpressing hZIP1 accumulated intracellular zinc</li> <li>- hZIP1 might act as a zinc sensing protein</li> </ul>                                                                                                                                                       | [29] |
| Caco-2 (1)<br>IPEC-J2 (2)<br>Cultivation time (1):<br>Pre-confluent (2-3 d)<br>Post-confluent (19-21 d)<br>2D                    | 0-200 µM ZnSO <sub>4</sub> (in DMEM +10% FCS)<br>for 6 h and 24 h                      | Zinc uptake: total Zn<br>Gene expression: qPCR                                                                                                                        | <ul style="list-style-type: none"> <li>- cellular zinc uptake increases significantly after incubating with 200 µM zinc for 24 h</li> <li>- zinc incubation of post-confluent Caco-2 cells did not change <i>zip-4</i> and only showed a trend in <i>mt1a</i> and <i>znt-1</i> upregulation</li> <li>- enterocyte zinc homeostasis is maintained by expression of these genes</li> </ul>                                                                                           | [30] |
| Caco-2 (1)<br>IPEC-J2 (2)<br>Cultivation time (1):<br>21 d<br>3D Transwell                                                       | 0-200 µM ZnSO <sub>4</sub> (apical or basolateral side, in DMEM + 10% FCS)<br>for 24 h | Gene expression: qPCR                                                                                                                                                 | <ul style="list-style-type: none"> <li>- <i>znt-1</i> and <i>mt</i> expression ↑ with higher added zinc concentrations basolaterally</li> <li>- <i>zip4</i> expression did not change</li> </ul>                                                                                                                                                                                                                                                                                   | [31] |
| Caco-2<br>Cultivation time:<br>24 h                                                                                              | 3 or 150 µM zinc (in serum free DMEM)<br>for 24 h                                      | MTF-1 depletion by transient transfection with siRNA<br>MT-2a stable transfection<br>Transiently transfection with ZnT-5 promotor<br>Gene expression: Microarray qPCR | <ul style="list-style-type: none"> <li>- zinc-dependent expression of MTF-1 dependent genes in MTF-1 depleted Caco-2 compared to CTR:<br/><i>znt-1</i> ↓ and <i>mt-1b</i> ↓, <i>mt-1e</i> ↓, <i>mt-1g</i> ↓, <i>mt-1h</i> ↓, <i>mt-1m</i> ↓, <i>mt-2a</i> ↓, <i>mt-1a</i> , <i>mt-2a</i> and <i>mt-x</i> did not change</li> <li>- in MTF-1 depleted cells, zinc incubation changed mRNA expression of genes that are normally not affected by increased cellular zinc,</li> </ul> | [32] |

---

indicating that MT and ZnT-1 are buffering their  
expression

- MT-2a overexpressed Caco-2 cells  
showed higher ZnT-5 promoter activity upon zinc  
uptake
- MTF-1 is controlling intracellular zinc  
homeostasis by regulating MT and ZnT-1

---

3D, three-dimensional; DMEM, Dulbecco's Modified Eagles Medium; EHS, Engelbreth-Holm-Swarm cells; FCS, fetal calf serum; HBSS, Hank's Balanced Salt Solution; n.a., not available; PC, polycarbonate; TEER, transepithelial electrical resistance; TJ, tight junction; Zn, zinc.

**Table 4.** Application of *in vitro* Caco-2 monocultures to investigate the effect of dietary factors on zinc bioavailability.

| Cell Model                                                                      | Zinc Added                                                                                                                                          |                 | Food Component or Ligand                                                                                           | Quantification                                                        | Main Outcome                                                                                                                                                                                                                                         | Reference |
|---------------------------------------------------------------------------------|-----------------------------------------------------------------------------------------------------------------------------------------------------|-----------------|--------------------------------------------------------------------------------------------------------------------|-----------------------------------------------------------------------|------------------------------------------------------------------------------------------------------------------------------------------------------------------------------------------------------------------------------------------------------|-----------|
| Caco-2<br>Cultivation<br>time: 10-12 d<br>2D and<br>3D Transwell                | ZnSO <sub>4</sub><br>FeCl <sub>3</sub><br>(apical:<br>HEPES buffer,<br>basolateral:<br>DMEM + 15%<br>FCS)<br>for 1 h (uptake),<br>1-5 h (transport) | -               | Inositolphosphates (IP) (phytic<br>acid): IP3, IP4, IP5, IP6                                                       | radioactive zinc<br>and iron ( <sup>65</sup> Zn,<br><sup>55</sup> Fe) | - inhibition of iron and zinc<br>transport by phytate in Caco-2<br>- reduction of zinc uptake<br>and transport rate correlated with<br>level phosphorylation (IP3 to IP6)<br>- cellular uptake was<br>analyzed in 2D, transport with 3D<br>transwell | [33]      |
| Caco-2<br>Cultivation<br>time: 15-18 d<br>2D                                    | 40.22 µM ZnCl <sub>2</sub> ,<br>88.24 µM FeCl <sub>3</sub> or<br>823.53 µM CaCl <sub>2</sub><br>respectively (in<br>uptake buffer)                  | -<br><br>-      | infant formulas: adapted (milk<br>based) and soy-based<br><i>in vitro</i> digestion model                          | total zinc                                                            | - lower zinc uptake von soy-<br>based than from milk-based infant<br>formulas<br>- cellular zinc uptake solely<br>observed from digested infant<br>formulas and not from liquid metal<br>solutions                                                   | [34]      |
| Caco-2<br>Cultivation<br>time:<br>19 – 21 d<br>3D Transwell<br>(PE<br>membrane) | sample <sup>c</sup><br>(apical: soluble<br>mineral fraction,<br>basolateral: HBSS<br>buffer)<br>for 2 h                                             | -<br><br>-<br>- | raw legumes: white beans,<br>chickpeas, lentils<br>effect on cooking of lentils<br><i>in vitro</i> digestion model | total zinc                                                            | - chickpeas yielded the<br>highest amount of transported zinc<br>- cooking process negatively<br>affected the mineral content of<br>lentils and the soluble zinc fraction<br>decreased                                                               | [35]      |
| Caco-2<br>Cultivation<br>time: 21 d<br>3D Transwell<br>(PES<br>membrane)        | sample <sup>c</sup><br>(apical: soluble<br>mineral fraction;<br>basolateral: HBSS<br>buffer)<br>for 2 h                                             | -               | - school meals<br><i>in vitro</i> digestion model                                                                  | total zinc                                                            | - iron, copper, zinc and<br>calcium uptake and transport was<br>analyzed<br>- protein content of meals<br>had no influence on zinc uptake<br>- negative mineral<br>interaction of iron and zinc:                                                     | [36]      |

|                                                                   |                                                                                    |                                                                                                                                                                                                                                                                                                                                                                       |                                       |                                                                                                                                                                                                                                                                                                                                                                                                                                                                                                  |      |
|-------------------------------------------------------------------|------------------------------------------------------------------------------------|-----------------------------------------------------------------------------------------------------------------------------------------------------------------------------------------------------------------------------------------------------------------------------------------------------------------------------------------------------------------------|---------------------------------------|--------------------------------------------------------------------------------------------------------------------------------------------------------------------------------------------------------------------------------------------------------------------------------------------------------------------------------------------------------------------------------------------------------------------------------------------------------------------------------------------------|------|
|                                                                   |                                                                                    |                                                                                                                                                                                                                                                                                                                                                                       |                                       | soluble iron decreased and transported zinc; soluble zinc and iron retention                                                                                                                                                                                                                                                                                                                                                                                                                     |      |
| Caco-2<br>Cultivation time: 14-12 d<br>2D                         | 25 $\mu\text{M}$ $^{65}\text{ZnCl}_2$<br>(in MEM)<br>for 3 h                       | <ul style="list-style-type: none"> <li>- phytic acid, tannic acid, tartaric acid, polyphenols (from tea extract and grape juice), wheat, arginine, methionine, histidine</li> <li>- molar ratio: zinc/dietary ligands (1:1; 1:5; 1:10)</li> <li>- <i>in vitro</i> digestion model (use of dialysis membrane for incubation of cells with digested samples)</li> </ul> | radioactive zinc ( $^{65}\text{Zn}$ ) | <ul style="list-style-type: none"> <li>- zinc depletion with TPEN increased zinc uptake, but zinc repletion did not affect uptake</li> <li>- zinc uptake in Caco-2 cells shows a saturable and non-saturable component depending on added zinc concentration</li> <li>- tannic acid (1:50) enhanced zinc uptake from wheat- and rice-food-matrix</li> <li>- histidine, phytate, tartaric acid (1:1) and methionine (1:10) resulted in decreased zinc uptake relative to control cells</li> </ul> | [37] |
| Caco-2<br>Cultivation time: 14-21 d<br>3D Transwell (PE membrane) | sample <sup>c</sup><br>(in salt buffer)<br>for 2 h                                 | <ul style="list-style-type: none"> <li>- influence of caseinophosphopeptides (CPPs) and milk on zinc uptake from fruit beverages</li> <li>- <i>in vitro</i> digestion model</li> </ul>                                                                                                                                                                                | total zinc                            | <ul style="list-style-type: none"> <li>- zinc retention, transport and uptake was higher for milk-containing fruit beverages than for CPPs-based fruit beverages</li> </ul>                                                                                                                                                                                                                                                                                                                      | [38] |
| Caco-2<br>Cultivation time: 21 d<br>3D Transwell (PC membrane)    | sample <sup>c</sup><br>(apical: HEPES, MES, glucose, basolateral: HBSS)<br>for 3 h | <ul style="list-style-type: none"> <li>- cereals and dephytinized cereals (phytase)</li> <li>- <i>in vitro</i> digestion model</li> </ul>                                                                                                                                                                                                                             | total zinc                            | <ul style="list-style-type: none"> <li>- effect of dephytinization on zinc, iron and calcium bioavailability in Caco-2 cells</li> <li>- zinc and iron solubility and fractional zinc and iron absorption increased after dephytinization of cereals</li> </ul>                                                                                                                                                                                                                                   | [39] |
| Caco-2<br>Cultivation time: 11-13 d<br>2D                         | 50 $\mu\text{M}$ $^{65}\text{ZnCl}_2$<br>Iron-zinc interactions:<br>Zn:Fe (1:1)    | <ul style="list-style-type: none"> <li>- ascorbic acid (1 mM) and phytic acid, tannic acid, tartaric acid, cysteine, histidine, methionine (each 500 <math>\mu\text{M}</math>)</li> </ul>                                                                                                                                                                             | radioactive zinc ( $^{65}\text{Zn}$ ) | <ul style="list-style-type: none"> <li>- ascorbic acid, tartaric acid and tannic acid increased zinc uptake</li> </ul>                                                                                                                                                                                                                                                                                                                                                                           | [40] |

|                                                                                |                                                                       |                                                                                                                                                                                                                                                                               |                                         |                                                                                                                                                                                                                                                                                                                                   |      |
|--------------------------------------------------------------------------------|-----------------------------------------------------------------------|-------------------------------------------------------------------------------------------------------------------------------------------------------------------------------------------------------------------------------------------------------------------------------|-----------------------------------------|-----------------------------------------------------------------------------------------------------------------------------------------------------------------------------------------------------------------------------------------------------------------------------------------------------------------------------------|------|
|                                                                                | (in DMEM)<br>for 2 h                                                  |                                                                                                                                                                                                                                                                               |                                         | <ul style="list-style-type: none"><li>- phytic acid and histidine decreased cellular zinc uptake</li><li>- increase of iron uptake in presence of methionine, increased also zinc uptake</li><li>- without added ligands, zinc inhibited iron uptake into Caco-2</li><li>- ligands can modulate iron : zinc-interaction</li></ul> |      |
| Caco-2<br>Cultivation<br>time: 12-14 d<br>2D                                   | 25 μM <sup>65</sup> ZnCl <sub>2</sub><br>(in MEM)<br>for 3 h          | <ul style="list-style-type: none"><li>- polyphenol-rich beverages: red wine, green tea, red grape juice</li><li>- tannic acid, quercetin, gallic acid, caffeic acid (each 250μM)</li><li>- <i>in vitro</i> digestion model (including a rice matrix)</li></ul>                | radioactive zinc<br>( <sup>65</sup> Zn) | <ul style="list-style-type: none"><li>- polyphenol-rich beverages increased cellular zinc uptake from digested rice matrix</li><li>- tannic acid and quercetin enhanced zinc uptake</li></ul>                                                                                                                                     | [41] |
| Caco-2<br>Cultivation<br>time: 21-28 d<br>3D Transwell<br>(PET-HD<br>membrane) | 50 μM zinc<br>(in HEPES buffer)<br>for 1 h                            | <ul style="list-style-type: none"><li>- water soluble vitamins: folic acid, nicotinic acid, ascorbic acid, riboflavin, thiamine, pyridoxine</li><li>- effect of oxidative species on vitamin-dependent zinc uptake was analyzed</li><li>- phytic acid and histidine</li></ul> | total zinc                              | <ul style="list-style-type: none"><li>- zinc transport was slightly enhanced by nicotinic acid and slightly decreased by thiamine, riboflavin, and pyridoxine</li><li>- phytic acid significantly decreased zinc uptake compared to control cells, where histidine resulted in a slight increase of zinc uptake</li></ul>         | [42] |
| Caco-2<br>Cultivation<br>time:<br>21 d<br>3D Transwell<br>(PC<br>membrane)     | sample <sup>c</sup><br>(in apical and<br>basolateral HBSS)<br>for 1 h | <ul style="list-style-type: none"><li>- samples from each stage of processing: wheat flour, whole wheat flour; fermented and final product: white bread, whole wheat bread, muffin</li><li>- <i>in vitro</i> digestion model</li></ul>                                        | total zinc                              | <ul style="list-style-type: none"><li>- effect of ‘processing’ of baking products on bioavailability of calcium, iron and zinc in Caco-2 cells</li><li>- no differences in zinc uptake from fermented dough and after baking</li></ul>                                                                                            | [43] |



|                                                                                                 |                                                   |                                                                                                                      |                                                    |                                                                                                                                                                                                                                                                               |                                                                          |  |
|-------------------------------------------------------------------------------------------------|---------------------------------------------------|----------------------------------------------------------------------------------------------------------------------|----------------------------------------------------|-------------------------------------------------------------------------------------------------------------------------------------------------------------------------------------------------------------------------------------------------------------------------------|--------------------------------------------------------------------------|--|
|                                                                                                 |                                                   |                                                                                                                      |                                                    |                                                                                                                                                                                                                                                                               | bioavailability in Caco-2 cells<br>comparable to <i>in vivo</i> analysis |  |
| Caco-2<br>Transwell<br>(PE)<br>Cultivation<br>time:<br>21 d<br>3D Transwell<br>(PE<br>membrane) | 250 µM ZnSO <sub>4</sub><br>(in DPBS)<br>for 2 h  | - GPAGPHGPPG peptide<br>(derived from Alaska pollock)                                                                | total Zn                                           | - influence of<br>GPAGPHGPPG peptide on zinc,<br>iron and calcium transport<br>- GPAGPHGPPG peptide<br>significantly increased mineral<br>transport.                                                                                                                          | [49]                                                                     |  |
| Caco-2<br>Cultivation<br>time:<br>10 d<br>2D                                                    | 50 µM ZnCl <sub>2</sub><br>(in PBS)<br>for 30 min | - amino acids (AAs): glutamate<br>(Glu), lysine (Lys), methionine (Met)<br>- ZnAAs complexes: ZnGlu,<br>ZnMet, ZnLys | Free zinc<br>(Fluorescent zinc<br>sensor Zinpyr-1) | - ZnAAs are probably<br>absorbed by AAs transporters<br>- zinc uptake into Caco-2<br>cells is not enhanced by ZnAAS<br>complexes<br>- results suggest that ZnAAs<br>represent a more efficient way for<br>zinc supplementation that zinc<br>salts; especially for AE patients | [50]                                                                     |  |

3D, three-dimensional; AAs, amino acids BSA, bovine serum albumin; DMEM, Dulbecco's Modified Eagles Medium; FCS, fetal calf serum; HBSS, Hank's Balanced Salt Solution; HD, high density; HEPES, 4-(2-hydroxyethyl)-1-piperazineethanesulfonic acid;; IP, inositolphosphate; MEM, minimum essential medium; n.a., not available; PC, polycarbonate; PE, polyethylene; PES, polyester; Zn, zinc; <sup>a</sup> MT formation was analyzed using a cadmium/hemoglobin assay; <sup>b</sup> reporter gene assay based on the metal response element (MRE)-binding transcription factor-1 (MTF-1) and MRE luciferase, <sup>c</sup> mineral bioavailability from the sample solely was examined; no extra zinc added.

**Abbreviations:**

|       |                                                                               |
|-------|-------------------------------------------------------------------------------|
| 2D    | two-dimensional                                                               |
| 3D    | three-dimensional                                                             |
| DGE   | German Society for Nutrition; ger. <i>Deutsche Gesellschaft für Ernährung</i> |
| DMEM  | Dulbecco's Modified Eagles Medium                                             |
| DMT-1 | divalent metal transporter                                                    |
| EFSA  | European Food Safety Authority                                                |
| EHS   | Engelbreth-Holm-Swarm cells                                                   |
| FAAS  | flame atomic absorption spectrometry                                          |
| FCS   | fetal calf serum                                                              |
| HD    | high density                                                                  |
| HBSS  | Hanks' Balanced Salt Solution                                                 |
| HEPES | 4-(2-hydroxyethyl)-1-piperazineethanesulfonic acid                            |
| IP    | inositolphosphate                                                             |
| KHB   | Krebs-Henseleit buffer                                                        |
| LMW   | low molecular weight                                                          |
| mRNA  | messenger ribonucleic acid                                                    |
| MEM   | minimum essential medium                                                      |
| MT    | metallothionein                                                               |
| MTF-1 | metal regulatory transcription factor 1                                       |
| PBMC  | peripheral blood mononuclear cells                                            |
| PBS   | phosphate buffered saline                                                     |
| PC    | polycarbonate                                                                 |
| PE    | polyethylene                                                                  |
| PES   | polyester                                                                     |
| PET   | photo-induced electron transfer                                               |
| qPCR  | quantitative real time polymerase chain reaction (PCR)                        |
| TEER  | transepithelial electrical resistance                                         |
| TJ    | tight junction                                                                |
| TPEN  | N,N,N',N'-tetrakis(2-pyridylmethyl)ethylenediamine                            |
| WHO   | World Health Organization                                                     |
| ZIP   | Zrt-, Irt-like protein                                                        |
| Zn    | zinc                                                                          |
| ZnT   | zinc transporter                                                              |

### Supplementary References:

1. Sachsenweger, M. *Augenheilkunde*. 2003; Vol. 2.
2. Karcioğlu, Z.A. Zinc in the eye. *Survey of Ophthalmology* **1982**, 27, 114-122.
3. Molina, D.K.; DiMaio, V.J. Normal organ weights in men: Part ii-the brain, lungs, liver, spleen, and kidneys. *Am J Forensic Med Pathol* **2012**, 33, 368-372.
4. Jackson, M.J. Physiology of zinc: General aspects. In *Zinc in human biology*, Mills, C.F., Ed. Springer London: London, 1989; pp 1-14.
5. Molina, D.K.; DiMaio, V.J. Normal organ weights in men: Part i-the heart. *Am J Forensic Med Pathol* **2012**, 33, 362-367.
6. Lech, T.; Sadlik, J.K. Zinc in postmortem body tissues and fluids. *Biological trace element research* **2010**, 142, 11-17.
7. Yamanaka, H.; Nakajima, M.; Katoh, M.; Yokoi, T. Glucuronidation of thyroxine in human liver, jejunum, and kidney microsomes. *Drug Metabolism and Disposition* **2007**, 35, 1642.
8. Boyd, R. Xii. Tables of the weights of the human body and internal organs in the sane and insane of both sexes at various ages, arranged from 2614 post-mortem examinations. *Philosophical Transactions of the Royal Society of London* **1861**, 151, 241-262.
9. Forbes, R.M.; Cooper, A.R.; Mitchell, H.H. The composition of the adult human body as determined by chemical analysis. *J Biol Chem* **1953**, 203, 359-366.
10. Clarys, J.P.; Martin, A.D.; Drinkwater, D.T. Gross tissue weights in the human body by cadaver dissection. *Human Biology* **1984**, 56, 459-473.
11. Yiengst, M.J.; Shock, N.W. Blood and plasma volume in adult males. *Journal of Applied Physiology* **1962**, 17, 195-198.
12. Folin, M.; Contiero, E.; Maria Vaselli, G. Zinc content of normal human serum and its correlation with some hematic parameters. *Biometals* **1994**, 7, 75-79.
13. Wilhelm, M.; Hafner, D.; Lombeck, I.; Ohnesorge, F.K. Monitoring of cadmium, copper, lead and zinc status in young children using toenails: Comparison with scalp hair. *The Science of the total environment* **1991**, 103, 199-207.
14. Scott, D.A.; Fisher, A.M. The insulin and the zinc content of normal and diabetic pancreas. *The Journal of clinical investigation* **1938**, 17, 725-728.
15. Rahil-Khazen, R.; Bolann, B.J.; Myking, A.; Ulvik, R.J. Multi-element analysis of trace element levels in human autopsy tissues by using inductively coupled atomic emission spectrometry technique (icp-aes). *Journal of Trace Elements in Medicine and Biology* **2002**, 16, 15-25.
16. World Health Organization / Food and Agricultural Organization. *Vitamin and mineral requirements in human nutrition*. 2 ed.; World Health Organization: Geneva, Switzerland, 2004.
17. EFSA Panel on Dietetic Products, N.a.A.N. Scientific opinion on dietary reference values for zinc. *EFSA Journal* **2014**, 12.
18. Deutsche Gesellschaft für Ernährung; Österreichische Gesellschaft für Ernährung; Schweizerische Gesellschaft für Ernährung. *Referenzwerte für die Nährstoffzufuhr*. 2 ed.; Deutsche Gesellschaft für Ernährung e. V.: Bonn, Germany, 2019; Vol. 2.
19. Miller, L.V.; Krebs, N.F.; Hambidge, K.M. A mathematical model of zinc absorption in humans as a function of dietary zinc and phytate. *The Journal of nutrition* **2007**, 137, 135-141.
20. Cragg, R.A.; Christie, G.R.; Phillips, S.R.; Russi, R.M.; Kury, S.; Mathers, J.C.; Taylor, P.M.; Ford, D. A novel zinc-regulated human zinc transporter, hztl1, is localized to the enterocyte apical membrane. *The Journal of Biological Chemistry* **2002**, 277, 22789-22797.
21. Cragg, R.A.; Phillips, S.R.; Piper, J.M.; Varma, J.S.; Campbell, F.C.; Mathers, J.C.; Ford, D. Homeostatic regulation of zinc transporters in the human small intestine by dietary zinc supplementation. *Gut* **2005**, 54, 469-478.
22. Valentine, R.A.; Jackson, K.A.; Christie, G.R.; Mathers, J.C.; Taylor, P.M.; Ford, D. Znt5 variant b is a bidirectional zinc transporter and mediates zinc uptake in human intestinal caco-2 cells. *The Journal of Biological Chemistry* **2007**, 282, 14389-14393.
23. Shen, H.; Qin, H.; Guo, J. Cooperation of metallothionein and zinc transporters for regulating zinc homeostasis in human intestinal caco-2 cells. *Nutrition Research* **2008**, 28, 406-413.

24. Pieri, M.; Christian, H.C.; Wilkins, R.J.; Boyd, C.A.; Meredith, D. The apical (hpept1) and basolateral peptide transport systems of caco-2 cells are regulated by amp-activated protein kinase. *American Journal of Physiology - Gastrointestinal and liver physiology* **2010**, *299*, G136-143.
25. Jackson, K.A.; Valentine, R.A.; McKay, J.A.; Swan, D.C.; Mathers, J.C.; Ford, D. Analysis of differential gene-regulatory responses to zinc in human intestinal and placental cell lines. *The British journal of nutrition* **2009**, *101*, 1474-1483.
26. Zemann, N.; Zemann, A.; Klein, P.; Elmadfa, I.; Huettinger, M. Differentiation- and polarization-dependent zinc tolerance in caco-2 cells. *European journal of nutrition* **2011**, *50*, 379-386.
27. Jou, M.Y.; Philipps, A.F.; Kelleher, S.L.; Lonnerdal, B. Effects of zinc exposure on zinc transporter expression in human intestinal cells of varying maturity. *Journal of pediatric gastroenterology and nutrition* **2010**, *50*, 587-595.
28. Wang, X.; Valenzano, M.C.; Mercado, J.M.; Zurbach, E.P.; Mullin, J.M. Zinc supplementation modifies tight junctions and alters barrier function of caco-2 human intestinal epithelial layers. *Digestive Diseases and Sciences* **2012**, *58*, 77-87.
29. Michalczyk, A.A.; Ackland, M.L. Hzip1 (hslc39a1) regulates zinc homeostasis in gut epithelial cells. *Genes & nutrition* **2013**, *8*, 475-486.
30. Gefeller, E.M.; Bondzio, A.; Aschenbach, J.R.; Martens, H.; Einspanier, R.; Scharfen, F.; Zentek, J.; Pieper, R.; Lodemann, U. Regulation of intracellular zn homeostasis in two intestinal epithelial cell models at various maturation time points. *The Journal of Physiological Sciences* **2015**, *65*, 317-328.
31. Lodemann, U.; Gefeller, E.M.; Aschenbach, J.R.; Martens, H.; Einspanier, R.; Bondzio, A. Dose effects of apical versus basolateral zinc supplementation on epithelial resistance, viability, and metallothionein expression in two intestinal epithelial cell lines. *Journal of biochemical and molecular toxicology* **2015**.
32. Hardyman, J.E.; Tyson, J.; Jackson, K.A.; Aldridge, C.; Cockell, S.J.; Wakeling, L.A.; Valentine, R.A.; Ford, D. Zinc sensing by metal-responsive transcription factor 1 (mtf1) controls metallothionein and znt1 expression to buffer the sensitivity of the transcriptome response to zinc. *Metallomics : integrated biometal science* **2016**, *8*, 337-343.
33. Han, O.; Failla, M.L.; Hill, A.D.; Morris, E.R.; Smith, J.C., Jr. Inositol phosphates inhibit uptake and transport of iron and zinc by a human intestinal cell line. *The Journal of nutrition* **1994**, *124*, 580-587.
34. Jovani, M.; Barbera, R.; Farre, R.; Aguilera, E.M.d. Calcium, iron, and zinc uptake from digests of infant formulas by caco-2 cells. *Journal of Agricultural and Food Chemistry* **2001**, *49*, 3480-3485.
35. Viadel, B.; Barberá, R.; Farré, R. Uptake and retention of calcium, iron, and zinc from raw legumes and the effect of cooking on lentils in caco-2 cells. *Nutrition Research* **2006**, *26*, 591-596.
36. Cámara, F.; Barberá, R.; Amaro, M.A.; Farré, R. Calcium, iron, zinc and copper transport and uptake by caco-2 cells in school meals: Influence of protein and mineral interactions. *Food Chemistry* **2007**, *100*, 1085-1092.
37. Sreenivasulu, K.; Raghu, P.; Ravinder, P.; Nair, K.M. Effect of dietary ligands and food matrices on zinc uptake in caco-2 cells: Implications in assessing zinc bioavailability. *Journal of Agricultural and Food Chemistry* **2008**, *56*, 10967-10972.
38. García-Nebot, M.J.; Alegría, A.; Barberá, R.; Clemente, G.; Romero, F. Does the addition of caseinophosphopeptides or milk improve zinc in vitro bioavailability in fruit beverages? *Food Research International* **2009**, *42*, 1475-1482.
39. Frontela, C. Effect of dephytinization on bioavailability of iron, calcium and zinc from infant cereals assessed in the caco-2 cell model. *World Journal of Gastroenterology* **2009**, *15*, 1977.
40. Iyengar, V.; Pullakhandam, R.; Nair, K.M. Dietary ligands as determinants of iron-zinc interactions at the absorptive enterocyte. *Journal of Food Science* **2010**, *75*, H260-264.
41. Sreenivasulu, K.; Raghu, P.; Nair, K.M. Polyphenol-rich beverages enhance zinc uptake and metallothionein expression in caco-2 cells. *Journal of Food Science* **2010**, *75*, H123-128.
42. Tupe, R.S.; Agte, V.V. Effect of water soluble vitamins on zn transport of caco-2 cells and their implications under oxidative stress conditions. *European journal of nutrition* **2009**, *49*, 53-61.
43. Frontela, C.; Ros, G.; Martínez, C. Phytic acid content and "in vitro" iron, calcium and zinc bioavailability in bakery products: The effect of processing. *Journal of Cereal Science* **2011**, *54*, 173-179.
44. Cheng, Z.; Tako, E.; Yeung, A.; Welch, R.M.; Glahn, R.P. Evaluation of metallothionein formation as a proxy for zinc absorption in an in vitro digestion/caco-2 cell culture model. *Food & function* **2012**, *3*, 732-736.

45. Kim, E.-Y.; Pai, T.-K.; Han, O. Effect of bioactive dietary polyphenols on zinc transport across the intestinal caco-2 cell monolayers. *Journal of Agricultural and Food Chemistry* **2011**, *59*, 3606-3612.
46. Jou, M.-Y.; Du, X.; Hotz, C.; Lönnerdal, B. Biofortification of rice with zinc: Assessment of the relative bioavailability of zinc in a caco-2 cell model and suckling rat pups. *Journal of Agricultural and Food Chemistry* **2012**, *60*, 3650-3657.
47. Salunke, R.; Rawat, N.; Tiwari, V.K.; Neelam, K.; Randhawa, G.S.; Dhaliwal, H.S.; Roy, P. Determination of bioavailable-zinc from biofortified wheat using a coupled in vitro digestion/caco-2 reporter-gene based assay. *Journal of Food Composition and Analysis* **2012**, *25*, 149-159.
48. Kruger, J.; Taylor, J.R.N.; Du, X.; De Moura, F.F.; Lönnerdal, B.; Oelofse, A. Effect of phytate reduction of sorghum, through genetic modification, on iron and zinc availability as assessed by an in vitro dialysability bioaccessibility assay, caco-2 cell uptake assay, and suckling rat pup absorption model. *Food Chemistry* **2013**, *141*, 1019-1025.
49. Chen, Q.; Guo, L.; Du, F.; Chen, T.; Hou, H.; Li, B. The chelating peptide (gpagphgppg) derived from alaska pollock skin enhances calcium, zinc and iron transport in caco-2 cells. *International Journal of Food Science & Technology* **2017**, *52*, 1283-1290.
50. Sauer, A.K.; Pfaender, S.; Hagmeyer, S.; Tarana, L.; Mattes, A.K.; Briel, F.; Kury, S.; Boeckers, T.M.; Grabrucker, A.M. Characterization of zinc amino acid complexes for zinc delivery in vitro using caco-2 cells and enterocytes from hipsc. *BioMetals* **2017**, *30*, 643-661.
